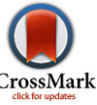

## Correction

# Correction: Exploitation of Insect Vibrational Signals Reveals a New Method of Pest Management

## The PLOS ONE Staff

There are errors in the funding statement. The correct funding statement is as follows: This research was supported by the Autonomous Province of Trento (Accordo di Programma 2010), Funding Research Programme P1-0255 and Research Project V4-0525 by Slovenian Research Agency, Fondi Ateneo of Pisa University, the European Union Seventh Framework Programme (FP7/ 2007-2013) under the grant agreement n°265865, and CBCEurope Ltd. (Milano, Italy). The funders had no role in study design, data collection and analysis, decision to publish, or preparation of the manuscript.

## Reference

1. Eriksson A, Anfora G, Lucchi A, Lanzo F, Virant-Doberlet M, et al. (2012) Exploitation of Insect Vibrational Signals Reveals a New Method of Pest Management. PLoS ONE 7(3): e32954. doi:10.1371/journal.pone.0032954

---

**Citation:** The PLOS ONE Staff (2014) Correction: Exploitation of Insect Vibrational Signals Reveals a New Method of Pest Management. PLoS ONE 9(6): e100029. doi:10.1371/journal.pone.0100029

**Published:** June 6, 2014

**Copyright:** © 2014 The PLOS ONE Staff. This is an open-access article distributed under the terms of the Creative Commons Attribution License, which permits unrestricted use, distribution, and reproduction in any medium, provided the original author and source are credited.
